1

1 Type: Research Paper

2 Title: The utility of visual estimation of cover for rapid assessment of graminoid abundance  
3 in forest and grassland habitats in studies of animal foraging

4

5 Author names: Hansraj Gautam, G. G. Potdar & T.N.C. Vidya

6

7 Author addresses: Gautam, H. ([hansrajgautam@jncasr.ac.in](mailto:hansrajgautam@jncasr.ac.in))<sup>1</sup>, Potdar, G. G.  
8 ([girishpotdar@gmail.com](mailto:girishpotdar@gmail.com))<sup>2</sup>, Vidya, T. N. C. (Corresponding author,  
9 [tncvidya@jncasr.ac.in](mailto:tncvidya@jncasr.ac.in))<sup>1,\*</sup>

10

11 <sup>1</sup>Evolutionary and Organismal Biology Unit, Jawaharlal Nehru Centre for Advanced  
12 Scientific Research, Bengaluru, India.

13 <sup>2</sup> Department of Botany, Yashwantrao Chavan College of Science, Karad, Maharashtra,  
14 India.

15 \* Corresponding author

16 Address for correspondence:

17 T.N.C. Vidya

18 Evolutionary and Organismal Biology Unit

19 Jawaharlal Nehru Centre for Advanced Scientific Research

20 Jakkur, Bengaluru – 560 064, India.

21 Email: [tncvidya@jncasr.ac.in](mailto:tncvidya@jncasr.ac.in)

22 Phone: +91-80-22082968

23 Fax: +91-80-22082766

24

25 Running head: Rapid assessment of graminoid abundance by visual estimation

26

27 **The utility of visual estimation of cover for rapid assessment of graminoid abundance in**  
28 **forest and grassland habitats in studies of animal foraging**

29

30 **Abstract:**

31 **Questions:** To assess the feasibility of using visually-estimated cover in rapid assessment of  
32 herbivore food species abundance in the grass layer, we asked the following questions: 1)  
33 What is the relationship between total graminoid cover and biomass in forests, and does  
34 height improve the prediction of biomass from cover? 2) How does total cover relate to  
35 biomass in a grassland habitat? 3) How does elephant food species graminoid cover relate to  
36 individual species biomass? 4) How well does species diversity of forest understorey grass  
37 layer, calculated from cover data, mirror that calculated from biomass data? **Location:**  
38 Nagarahole National Park, India. **Methods:** We estimated the abundance of graminoids  
39 through visual estimation of cover and weighted harvested biomass in forest and grassland  
40 plots. In forests, two estimates of total graminoid abundance, total graminoid cover and sum  
41 of species covers, were used. In the grassland, only total graminoid abundance was measured.  
42 We examined the relationship between cover estimates and biomass, and the additional utility  
43 of height in predicting biomass, using multiple regressions and AIC-based model selection.  
44 We also assessed similarity in cover- and biomass-based Simpson's and Shannon-Wiener  
45 diversity indices using regressions. **Results:** Graminoid cover explained a large portion of  
46 variation in total graminoid biomass in forest and grassland habitats. The sum of species  
47 covers was better than total cover in estimating total graminoid biomass in the forest. The  
48 benefit of including height to estimate total biomass was moderate in forests but substantial in  
49 grassland. Cover estimates were good proxies of food species biomass, and the addition of  
50 height did not yield better models for most species. Species diversity indices calculated from  
51 cover largely matched those based on biomass. **Conclusions:** Visual estimation of species  
52 cover is a good alternative to biomass harvesting for rapid assessment of abundance of  
53 graminoids consumed by generalist herbivores, like elephants.

54 **Key words:**

55 Elephant food species, graminoids, forage distribution, vegetation abundance, rapid  
56 assessment methods, visual estimation of cover, species diversity, tropical forests, grasslands.

57

58 **Author contribution:** HG and TNCV planned the work, performed statistical analyses and  
59 wrote the manuscript, HG did field sampling, GP did species identification and all the authors  
60 critically revised the manuscript.

61

## 62 **Introduction**

63 Ecologists estimate vegetation abundance in order to study various structural and functional  
64 attributes of plant communities (e.g. Hermy 1988, Guo and Rundel 1997, Chiarucci et al.  
65 1999, Henschel et al. 2005, Lavorel et al. 2008), the productivity of animals' habitats (e.g.  
66 Hutto 1990, Säid et al. 2005, Pettorelli et al. 2011, Iversion et al. 2014) and its effect on  
67 foraging behaviour (e.g. Wilmshurst et al. 1999), and the impact of animal activities on  
68 vegetation (e.g. Pekin et al. 2015). While studies of plant community structure and function  
69 may require intensive measurements of species abundance or traits (e.g. Chiarucci et al. 1999,  
70 Lavorel et al. 2008), assessment of resource availability for animals often necessitates  
71 sampling over large spatial scales (see Pettorelli et al. 2011), which would, therefore, benefit  
72 from rapid methods of estimating species abundance. The estimation of forage abundance is a  
73 pre-requisite in studies of ecological and behavioural aspects of foraging ecology (Hutto  
74 1990, Säid et al. 2005), but the collection of detailed forage abundance data may be very  
75 demanding in terms of effort, time, and resources, which are limitations for most field  
76 biologists. Different methods of estimating vegetation abundance vary in their sensitivity to  
77 vegetation structure, accuracy, precision, practicality, time and manpower required, and  
78 destructive nature (Harmony et al. 1997, reviewed in Wilson 2011), and no single method is  
79 clearly superior in all these respects. Given the apparent trade-off in methods between  
80 accuracy and speed, it has been suggested that the choice of method should be based on the  
81 objective of the study and after consideration of the advantages and limitations of each  
82 method (Elzinga et al. 1998, Lavorel et al. 2008, Wilson 2011, Redjadj et al. 2012).

83 The diet of the animal and the vegetation structure in its habitat will together determine  
84 whether the measurement of forage abundance should be carried out on all components of the  
85 vegetation or only on a portion of the vegetation (such as specific plants or plant parts). For  
86 example, all the vegetation of a largely monocultural grassland may be considered for  
87 quantifying the food abundance of a grazing herbivore, whereas many components of  
88 vegetation (herbs, shrubs, and tree species) in a forest or woodland may not be part of the  
89 same animal's diet, and only the food component of the vegetation should be measured.

90 Second, in studies of foraging, ecologists are also often interested in studying whether an  
91 animal shows selectivity at the species level during feeding (e.g. Owen-Smith and Chafota  
92 2012) and whether it maintains species diversity in its diet (e.g. Marsh et al. 2006). It is,  
93 therefore, also important for the method of estimation of forage abundance to provide  
94 species-level detail. Given the considerations above, several methods of abundance  
95 estimation become impractical or too time-consuming to implement in diverse habitats,  
96 primarily because the vegetation layers that are not relevant to foraging may dominate the  
97 biomass in forests with rich biodiversity. Unlike other estimation methods, the biomass  
98 harvest method (e.g. Drew 1944, Hermy 1988), and the visual estimation of cover (Kennedy  
99 and Addison 1987) can be applied even when a selected portion of vegetation is to be  
100 quantified. However, biomass-harvesting can be time-consuming if species have to be  
101 weighed separately, as this requires sorting of individuals into different species by hand  
102 (Harmony et al. 1997, Lavorel et al. 2008). In this regard, the use of visual estimation of  
103 cover may be advantageous, as it allows for rapid assessment of portions of vegetation and is  
104 also non-destructive.

105

106 #Fig. 1 approximately here#

107

108 We, therefore, tested the utility of the visual estimation method in predicting biomass in  
109 the context of forage availability for herbivores in general and for Asian elephants in a  
110 tropical forest in southern India in particular. Elephants are considered generalist herbivores,  
111 but primarily feed on grasses in the lower vegetation strata, in addition to stems and bark of  
112 woody species in the upper strata (Owen-Smith 1988, Sukumar 1990, Baskaran et al. 2010).  
113 Although their diet consists of numerous species, in species-rich tropical forests, this number  
114 may be a small proportion (Blake 2002, HG and TNCV unpubl. data) of all the species  
115 present. The estimation of abundance of woody species is simple as it involves the counting  
116 of trees and measurements of tree-girth which can be done rapidly since the number per plot  
117 is usually low. However, elephant foods in understory vegetation are represented by  
118 numerous individuals that are difficult to count within limited time. Moreover, most of the  
119 vegetation represented by herbs and shrubs is not consumed by elephants (in our study area,  
120 the abundance of food species as a percentage of all species in the respective vegetation strata  
121 during the wet and dry seasons, respectively, was about 23% and 10% for herbs, 18% and

122 16% for shrubs and 80% and 85% for graminoids, HG and TNCV unpubl. data). Therefore,  
123 in such habitats, the focus should be on estimating the abundance of only food plant species  
124 in the lower strata of the forest. The dominance of grasses in Asian elephant diet (Baskaran  
125 et al. 2010) makes its quantification crucial, and we explored the utility of the visual  
126 estimation method in assessing graminoid biomass. Since other herbivores in similar  
127 deciduous forests are also primarily grazers (Ahrestani et al. 2012), if the visual method could  
128 be used to reliably estimate biomass, our results would also have implications for the  
129 quantification of resource abundance for such herbivores. Therefore, we assessed the utility  
130 of visually estimated cover in explaining elephant food graminoid biomass, as well as total  
131 graminoid biomass, which would establish the generality of the method, for use in other  
132 species. We investigated the utility of this rapid method at the community level, as well as at  
133 the more detailed species level. We also examined the additional utility of height, another  
134 variable which can be rapidly measured, in modelling graminoid biomass in two types of  
135 habitats, forest and grassland. Such questions regarding biomass of graminoids have been  
136 rarely addressed in forest habitats (eg. Andariese and Covington 1986), especially in the  
137 context of forage availability for wildlife.

138 Previously, studies have found strong correlations between visual estimates and biomass  
139 (Hermy 1988, Guo and Rundel 1997, Chiarucci et al. 1999, Henschel et al. 2005, Axmanová  
140 et al. 2012) but were not carried out in the context of sampling food availability for wildlife.  
141 On the other hand, studies on foraging ecology have sometimes used visual estimation for  
142 assessment of forage distribution (e.g. Noyce and Coy 1990, Blake 2002, Rebollo et al. 2013,  
143 Iversion et al. 2014), but the relationship between visual estimates and biomass of relevant  
144 foods has seldom been tested rigorously in a complex habitat (but see Noyce and Coy 1990  
145 for bear foods), which is important before making inferences about the relationship between  
146 resource distribution and forage selection.

147 The questions we addressed in this paper were the following:

148 1. What is the relationship between visually-estimated total graminoid cover and total  
149 graminoid biomass (measured through the standard biomass-harvest method) in forest  
150 habitats, and does the inclusion of height or using the visually-estimated sum of species  
151 covers improve the prediction of total graminoid biomass? This question would help find out  
152 if the visual estimation method can be used in general in a forest with multiple strata, in  
153 studies of foraging by grazing herbivores.

154 2. Does the relationship between visually-estimated total graminoid cover and total  
155 graminoid biomass (as seen from the results of question 1) also hold in a grassland habitat,  
156 and does the inclusion of height improve the prediction of total graminoid abundance?

157 3. How do visually-estimated species covers of individual graminoid food species of  
158 elephants relate to their respective species biomass measurements in forest habitats? Since the  
159 proportion of food graminoid species represents only a small fraction of all species in the  
160 herbaceous stratum of the vegetation in the forest sampled (HG and TNCV unpubl. data), if  
161 there was a high correlation between visually-estimated species cover and species biomass,  
162 visually estimated cover could be used to assess food species abundance and also estimate  
163 proportional abundance of different species.

164 4. How accurately do species diversity indices of the grass layer in forest habitat,  
165 measured by visual estimates, reflect the diversity indices obtained from biomass data? It  
166 would be desirable to obtain good diversity estimates in order to study selectivity of species  
167 and selection of different kinds of vegetation patches by herbivores.

168

## 169 **Study area**

170 The study was carried out in Nagarahole National Park (644 km<sup>2</sup>, 11.85°–12.26° N, 76.00°–  
171 76.28° E), which is a part of the larger contiguous Nilgiris-Eastern Ghats landscape in  
172 southern India (Figure 2). The forest is tropical deciduous, comprising several strata, and is  
173 home to several herbivores, including Asian elephants, on which a long-term study based on  
174 individually identified elephants is currently ongoing (see Vidya et al. 2014). Along the  
175 southern boundary of the park flows the river Kabini, on which a dam was constructed during  
176 the 1970s to create a reservoir that extends along the southern boundary of the park. During  
177 the dry season, when the waters of the reservoir recede, the exposed area forms a grassland  
178 consisting mostly of just two short grass species (*Cynodon dactylon* and *Sporobolus* sp.,  
179 which are also found in the forest, see Supporting Information 1) and attracts a large number  
180 of elephants, deer, and gaur. The graminoids in the grassland are shorter (mean height 5.7  
181 cm) and more continuously distributed compared to those in the forests (mean weighted  
182 average of species heights 24.6 cm), where they are more sparsely distributed. Both the  
183 grassland and the forest habitat are used by elephants, and data on graminoid abundance were  
184 collected from both types of habitats, as described below.

## 185 **Data sampling and analysis**

### 186 Forest data

187 Data collection in forests was done from November to December 2013. Based on a forest  
188 type classification map of the region developed by Pascal (1982), Nagarahole National Park  
189 was divided into the three major forest types: dry deciduous forest, moist deciduous forest,  
190 and teak plantations. We had previously divided the area into a 2 km × 2 km grid and placed  
191 60 1-km line transects in randomly selected cells in order to map the distribution of elephant  
192 food resources. During the present study, 23 of these transects in the southern and central  
193 parts of the park and 17 additional transects, at least half a km away from each other and at  
194 least 100 m away from forest roads, were chosen for sampling. Care was taken to adequately  
195 represent all three forest types (based on their availability) in the sampling sites. Sampled  
196 locations are mapped in Figure 2.

197

198 #Fig. 2 approximately here#

199

200 Sampling was carried out in 20 m × 5 m plots at the start or end of each of the 40 1-km  
201 transects. In each of these 20 m × 5 m plots, three 1 m × 1 m quadrats were sampled,  
202 equidistant along a straight diagonal line (except one plot, in which only two quadrats could  
203 be sampled due to the presence of dense *Lantana* thickets). This resulted in 119 quadrats  
204 sampled. We sampled all graminoid plants, including *Poaceae* (grasses), *Juncaceae* and  
205 *Cyperaceae*. Graminoid abundance was measured at two levels: total graminoid abundance  
206 (all the graminoid species present) and species-level abundance. First, total graminoid cover  
207 was visually estimated by a single observer (HG) as the percentage of quadrat area covered  
208 by all graminoids (Figure 1). Second, species cover for each graminoid species was visually  
209 estimated, independent of the cover of other species. Cover was estimated to the closest 5%  
210 or in interval bin of 5% (for low values such as 0 to 5% cover), in which case, the middle  
211 value of the interval was chosen as the cover value. Values of less than 5% were applied in  
212 the case of rare species that were represented by only one or two individuals in the quadrat.  
213 Four individuals (except in the case of rare species, in which fewer than four individuals were  
214 available) of each species were arbitrarily selected, their natural standing heights (i.e. without  
215 straightening the plant) were measured, and the average of these was used as the height for



216 that species. The total graminoid (fresh) biomass was measured in the field using a digital  
217 weighing balance (with 1 gram precision) after harvesting all the graminoids from the ground  
218 level. Individuals were then hand-sorted into the respective species, and the biomass of each  
219 species was measured.

220 At the level of the graminoid community, two measures of visually-estimated overall  
221 graminoid abundance were used: total graminoid cover as described above, and the sum of  
222 species cover (the sum of individual graminoid species covers; the value might exceed 100%  
223 since each species was assessed independently; see Figure 1). Total graminoid biomass was  
224 normally distributed whereas individual species biomass data were non-normal and were,  
225 therefore, log-transformed for the analyses. However, the analyses were also performed on  
226 untransformed data to evaluate the robustness of the results. We first used homogeneity of  
227 regression slopes test (Zar 1974) to inspect the effect of forest type (dry deciduous, moist  
228 deciduous and teak forests) on the relationship between total graminoid biomass and overall  
229 graminoid cover. Similar relationships between total biomass and overall cover in different  
230 forest types would result in a homogeneity of slopes. We then performed multiple regressions  
231 of biomass on both estimates of overall graminoid cover to assess the utility of both measures  
232 in predicting total graminoid biomass. We also used the weighted average of graminoid  
233 species heights (weighted according to species cover) as an additional explanatory variable  
234 and performed multiple regressions to test the utility of height in improving total biomass  
235 estimates. Akaike information criterion with small sample correction (*AICc*; Hurvich and  
236 Tsai 1989) was used for selection from the regression models including and excluding height.  
237 Although there was a homogeneity of slopes (see Results) and plots from all forest types  
238 could be combined for further analyses, we used forest type as a factor to account for the off-  
239 chance that pooling the data would affect the results. In order to include the information on  
240 forest type in multiple regressions, two dummy categorical variables were generated:  
241 deciduous (category 1) or not (category 0 representing teak plantation), and moist deciduous  
242 (1) or not (0 representing dry deciduous forest when the previous categorical variable had  
243 value 1). These two variables were included in all regression analyses of data from the forest  
244 habitats. At the level of individual species, multiple regressions (including the variables for  
245 forest type) of species cover on species biomass were carried out for 10 common species (the  
246 other species were present in fewer than 10 plots) all of which happened to be elephant food  
247 species. We also checked whether multiple regressions that included the individual species'  
248 height explained variation in individual species' biomass better compared to regressions



249 lacking this information. Model selection from the two types of regression models was done  
250 on the basis of *AICc*. All the regressions described above were carried out on data from two  
251 spatial scales: a) 1 m × 1 m quadrat level on which the measurements were originally made,  
252 and b) 20 m × 5 m plot level, such that the plots were spatially independent. Values of  
253 different variables in 1 m × 1 m quadrats were averaged to obtain values for the 20 m × 5 m  
254 plots.

255 We also carried out multiple regressions to find out how closely species diversity  
256 calculated using visually assessed cover data matched that calculated using biomass data. We  
257 calculated two commonly used measures of species diversity, Simpson's diversity index and  
258 Shannon-Wiener index of diversity (see Southwood and Henderson 2009)). We calculated  
259 diversity of a) all the graminoid species and b) only elephant food species. Diversity index  
260 values from the three quadrats of every plot were averaged, and analyses were carried out  
261 using the average index value for each plot. Forest type variables were used as described  
262 above in all multiple regressions.

263

#### 264 Grassland data

265 Seven large stretches (called zones) across the length of the grassland were sampled. A zone  
266 would, therefore, be somewhat analogous to the 20 × 5 m plots in the forest, within which  
267 quadrats were sampled, although zones were much larger and quadrats within zones were  
268 randomly placed. Within each zone, 20 independent quadrats (1 m × 1 m) were marked, each  
269 chosen by walking from the centre of the zone up to a randomly chosen distance and along a  
270 randomly chosen direction (distance and angle obtained from a random number generator).  
271 Visual estimation of total graminoid cover was carried out in these quadrats and graminoid  
272 heights were measured before harvesting the above-ground biomass. Species-level data were  
273 not sampled since the only two grass species present could not be differentiated in their non-  
274 flowering states. Both these grasses are fed upon by elephants. The data were collected  
275 during four 30-day periods between mid-February and mid-June 2015 with equal numbers of  
276 random quadrats sampled in each period. Biomass measurements for 10 quadrats could not be  
277 performed because of heavy rain, which might have affected the weight significantly.

278 General regression models were used to analyse data from grassland quadrats. Total  
279 graminoid biomass was used as a dependent variable, total graminoid cover as an

280 independent variable, and month and zone as categorical predictors to control for the effect of  
281 variation due to time and location, respectively. The analysis was done both with and without  
282 graminoid height as a continuous predictor.

283 Analyses were performed using Statistica 8 (StatSoft 2007).

## 284 **Results**

### 285 *Relationship between visually-estimated total graminoid cover and total graminoid biomass* 286 *in forest habitat*

287 Based on the analysis of data from the 40 plots sampled in the three forest types, the mean  
288 graminoid biomass was 0.204 kg (95% CI: 0.165 to 0.241 kg). We found no effect of forest  
289 type on the relationship between total biomass and total cover, between total biomass and the  
290 sum of species covers, or between total biomass and weighted average of species heights (see  
291 Table 1). The statistics for regressions tests of how well the graminoid biomass is explained  
292 by cover and height are shown in Table 2. We found that both total graminoid cover and the  
293 sum of graminoid species cover were able to explain a large amount of variation in total  
294 biomass, with the sum of species cover showing a slightly higher coefficient of determination  
295 than the total cover (scatter-plots shown in Figure 3). Inclusion of weighted average of  
296 species heights to the multiple regression increased the coefficient of determination slightly  
297 in the case of sum of species cover and total cover compared to the respective models without  
298 the inclusion of height (Table 2). The small difference in *AICc* in both cases suggested that  
299 the models including height were not significantly better.

300

301 #Table 1 approximately here.

302

303 #Table 2 approximately here.

304

305 #Fig. 3 approximately here#

306

307 *Relationship between visually-estimated species covers of graminoid food species of*  
308 *elephants and their respective species biomass in forest habitat*

309 Analyses of species-wise abundance at the plot level showed strong relationships between  
310 biomass and visually-estimated species cover for all the common (which were present in 10  
311 or more plots) graminoid species ( $R^2=0.63$  to  $0.98$ ; Table 3). Multiple regressions using  
312 species average height as an additional predictor variable also yielded high  $R^2$  values  
313 ( $R^2=0.69$  to  $0.98$ ; Table 3), although average height had a significant effect in the regression  
314 only in the case of *Oplismenus compositus* and *Digitaria* sp.2 at the plot level (Table 3). With  
315 the exception of *Oplismenus compositus*, the  $AICc$  values for all other species tested were  
316 smaller when height was not included in the model to estimate biomass compared to the  
317 model when height was included along with cover. However, the differences in  $AICc$  values  
318 between the respective models were small, indicating that the models with and without  
319 heights largely performed equally well. At the quadrat level also (Table 4), high regression  
320 coefficients were obtained from the regression models that used species cover ( $R^2=0.68$  to  
321  $0.90$ ) and the regressions that used both species cover and height ( $R^2=0.68$  to  $0.90$ ), with  
322 height having a significant effect in the case of *Cyrtococcum accrescens*, *Cyrtococcum*  
323 *oxyphyllum*, *Cyrtococcum patens*, *Oplismenus compositus*, and *Oryza sativa*. The  $AICc$   
324 values were smaller in the models that included height in these species but none of the  
325 species showed large differences ( $>10$ ) in  $AICc$  that would suggest an overwhelming  
326 advantage to adding height in regression models (Table 4).

327

328 #Table 3 approximately here.

329

330 #Table 4 approximately here.

331

332 *Relationship between diversity indices calculated from visually-estimated species covers and*  
333 *the respective species biomass in forest habitat*

334 The average number of graminoid species per  $1\text{ m} \times 1\text{ m}$  quadrat was 4.7 (95% CI: 4.02–  
335 5.38) out of which the average number of food species per quadrat was 3.74 (95% CI: 3.24–  
336 4.24). Species diversity calculated using visually-estimated cover explained a large

337 proportion of variance in the diversity calculated using biomass data, at both the plot level  
338 (20 m × 5 m) and quadrat level, and when diversity was measured by either the Simpson's  
339 diversity index or the Shannon-Wiener diversity index ( $H'$ ) (Figure 4, Table 5). Similar  
340 regressions of biomass-based diversity on visual cover-based diversity using only elephant  
341 food graminoid species, rather than all graminoid species, also showed strong relationships  
342 (Table 5).

343

344 #Table 5 approximately here

345

346 #Fig. 4 approximately here#

347

348 *Relationship between visually-estimated total graminoid cover and total graminoid biomass*  
349 *in grassland habitat*

350 Based on data from 550 quadrats, the mean graminoid biomass was calculated to be 0.684 kg  
351 (95% CI: 0.655–0.712 kg). Visual estimation of total graminoid cover, along with month and  
352 zone ID as categorical predictors, explained total graminoid biomass to a large extent  
353 (General regression model, test of SS Whole Model vs. SS Residual:  $R = 0.78$ ,  $R^2 = 0.61$ ,  $F[3,$   
354  $54] = 281.64$ ,  $P < 0.001$ ,  $AICc = -1687.49$ ). The effects of total graminoid cover and month  
355 were significant ( $\beta_{\text{total graminoid cover}} = 0.51$ ,  $\beta_{\text{month}} = 0.41$ ), whereas zone did not have a  
356 significant effect. The addition of average height improved the  $R^2$  value (Test of SS Whole  
357 Model vs. SS Residual:  $R = 0.83$ ,  $R^2 = 0.69$ ,  $F[4, 544] = 306.84$ ,  $P < 0.001$ ,  $AICc = -1819.85$ ),  
358 with significant effects of total graminoid cover, height, and month, but not zone, on biomass  
359 ( $\beta_{\text{total graminoid cover}} = 0.44$ ,  $\beta_{\text{height}} = 0.30$ ,  $\beta_{\text{month}} = 0.41$ ).

360

## 361 **Discussion**

362 We found that visual assessment of cover, which allows for rapid sampling, performed very  
363 well in assessing forage availability in forest and grassland habitat. Using this method, we  
364 were able to obtain fairly accurate estimates of biomass of graminoids in general and food  
365 graminoids of Asian elephants in particular. The biomass harvest method has been suggested

366 to be an ideal measure of abundance (Wilson 1991, Chiarucci et al. 1999) of herbaceous  
367 vegetation, but can be time-consuming if species have to be hand-sorted and weighed  
368 separately (Harmony et al. 1997, Lavorel et al. 2008). Biomass harvesting also has limitations  
369 with respect to permits in critical wildlife areas because of its destructive nature, unlike visual  
370 estimation of cover. We found that visually estimated cover, which does not suffer from these  
371 drawbacks, was a good proxy for biomass of individual food species, as well as total  
372 graminoid biomass, in complex forest habitats. Such estimation of individual species or  
373 portions of the vegetation (in our study area, herbs are more abundant than graminoids) is not  
374 feasible with other non-destructive methods (discussed in Radloff and Mucina 2007, Redjadj  
375 et al. 2012, Walter et al. 2015). An objection to the visual estimation of species covers had  
376 been that the “sum of species covers” as a measure of total cover would give “non-sense  
377 number”s that exceeded 100% (Wilson 2011). Wilson (2011) had argued that there was no  
378 particular reason why between-species leaf overlaps would be helpful while within-species  
379 overlaps would not be important. However, empirically, the sum of species covers performed  
380 better at explaining total graminoid biomass in our study, and, perhaps, this is because it  
381 incorporates at least some (between-species) overlap component (see Figure 1), unlike the  
382 total graminoid cover that does not include any overlap. The sum of graminoid species covers  
383 may perform better than total graminoid cover when the within-species leaf overlap is smaller  
384 than the between-species leaf overlap. We speculate that this might be true of forests with  
385 multiple strata, in which individuals in the lower strata avoid self-shading and individuals of  
386 the same species are not very close to one another in order to reduce competition. Since the  
387 sum of graminoid species cover better represents total biomass compared to total cover (as  
388 discussed above) and since species-level cover estimates are highly related to species  
389 biomass, one can obtain good estimates of the proportional abundance of foods by dividing  
390 the sum of food species covers by the sum of all species covers. This would be useful for  
391 studies on foraging ecology in tropical forests with high diversity where food species are a  
392 small fraction of the total number of species present.

393 The inclusion of height in regression models yielded mixed results. In the forests, total  
394 graminoid biomass and sum of species biomass were explained adequately by cover and most  
395 models that included height were not substantially better than those that did not include  
396 height (small differences in *AICc*). The effect of height was not significant at the individual  
397 species-level also for most food species. On the other hand, the relationship between cover  
398 and total graminoid biomass was improved by the inclusion of average height in the grassland

399 habitat. This pattern may result from higher variability in total cover (average total graminoid  
400 cover=54.85%, CV total graminoid cover=42.33%) than in height (average weighted  
401 height=24.63cm, CV weighted height=32%) in forest habitat. As cover by graminoids  
402 saturates (total cover estimate has an upper limit of 100% whereas biomass and height are not  
403 limited) and relative variability in cover decreases vis-à-vis height, for example, in grasslands  
404 or swamps, the explanatory power of height with respect to that of cover is expected to  
405 increase. Thus, in the grassland habitat, where cover is closer to saturation and less variable  
406 (average total graminoid cover: 87.27%, CV for total graminoid cover: 19.17%; average  
407 height=5.71cm, CV for height: 46.84%) the effect of height relative to that of graminoid  
408 cover ( $\beta_{\text{total graminoid cover}}=0.44$ ,  $\beta_{\text{height}}=0.30$ ,  $P<0.05$  for both) was greater than that in the  
409 forest habitat ( $\beta_{\text{total graminoid cover}}=0.78$ ,  $\beta_{\text{weighted average of species heights}}=0.21$ ,  $P<0.05$  for both).  
410 We thus found that there was no overwhelming benefit to including height in forest habitat,  
411 while it might be worthwhile measuring height in grassland habitat. The improvement in  
412 biomass estimation models after inclusion of height has also been reported in other grassland  
413 habitats like tussock-grasslands in alpine Andes (Oliveras et al. 2013) and rangelands in  
414 Argentina (Guevara et al. 2002). In forest habitats, such relationships have been rarely  
415 studied for graminoids, although in one study in pine forests of Arizona, height did not result  
416 in substantial improvement to predictive power of models that used only cover (Andariese  
417 and Covington 1986). In habitats where cover is near saturation value (100%), we suggest  
418 that measurement of height can substantially improve biomass estimates, as seen in grassland  
419 habitat in our study. The limited predictive power of cover in plots with high cover values  
420 (above 80%) has also been discussed in Axmanová et al. (2012) for wet meadows of  
421 temperate Central Europe. One caveat is that we do not know if graminoid height itself  
422 affects selection of foraging sites by animals.

423 We also found that the species diversity of graminoids as calculated from cover data  
424 explained large variations in the diversity indices measured from biomass data when used  
425 along with forest type as a categorical variable. This similarity in community characteristics  
426 from the two methods further support the utility of visual estimation as a rapid assessment  
427 method in foraging ecology since ecologists may also be interested in assessing the diversity  
428 of foraging sites in order to test whether an animal selects a few food items or feeds on a  
429 wide range of species from the available plant species (e.g. Owen-Smith and Chafota 2012).  
430 Apart from selectivity, since prolonged feeding on a few plant species may result in  
431 accumulation of specific secondary metabolites which can be difficult to detoxify by the

432 mechanism for those metabolites, it is hypothesised that feeding on a wide range of species  
433 allows multiple counter pathways to share the load of detoxification of multiple types of  
434 secondary metabolites (reviewed in Marsh et al. 2006). Some generalist feeders may thus  
435 adopt a strategy of feeding on a variety of plants, thereby increasing their feeding rates.  
436 Quantification of species diversity may thus be useful in addressing such proximal aspects of  
437 foraging which affect patch selection. Such proximate mechanisms have been invoked to  
438 explain the relation between the diet of African elephants and tree diversity in the habitat  
439 (Cordon et al. 2011).

440

441 One possible limitation of this study is that we measured fresh rather than dry biomass.  
442 Fresh biomass has a component of leaf water content, which can change temporally based on  
443 environmental conditions. Therefore, the cover-biomass relationship that we recovered based  
444 on fresh biomass measurement may not be the same as that based on dry biomass  
445 measurement. However, it is often of interest to measure fresh biomass in studies of foraging  
446 because that is the weight of food that an animal would consume. We addressed the issue of  
447 observer bias associated with the visual method (Tonteri 1990) to some extent by having a  
448 single observer (HG) carry out the cover estimation from all sites. As observer-related errors  
449 can cumulatively become large if many observers are involved in data collection (Tonteri  
450 1990, Klimeš 2003), it would be necessary to consider the error across observers before the  
451 final estimation.

452 In summary, we find that the visual estimation method performs very well in assessing  
453 forage availability in a tropical forest and a grassland habitat, and can, therefore, be used in  
454 studies of elephant habitat and forage selection. This will save time and allow for sampling a  
455 larger number of sites. Our study was carried out in tropical deciduous forests, which  
456 constitute more than 65% of the total forest area in India (Reddy et al. 2015) and about one-  
457 sixth of the forest cover in South-east Asia (Wohlfart et al. 2014). It is likely that the positive  
458 relationship between cover and biomass will hold in similar forests, although the strength of  
459 the relationship may vary geographically. We do not imply that the relationships we find are  
460 completely transferable to other locations and suggest independent assessments in order to  
461 develop site-specific cover-to-biomass models. However, since we show that visual estimates  
462 of cover can be very useful in studies of foraging, this opens up the method for use by various  
463 researchers, who may have otherwise been deterred from using this based on a few previous



464 studies. Moreover, since other sympatric ungulates like *Axis axis* and *Bos gaurus* are also  
465 primarily grazers (Ahrestani et al. 2012), the visual estimation method should also work well  
466 for quantifying the resource distribution for these generalist ungulates in our study site and  
467 similar deciduous forests.

468

## 469 **Acknowledgements**

470 This work was funded by the Department of Science and Technology's (Government of  
471 India) Ramanujan Fellowship to TNCV, the Council of Scientific and Industrial Research,  
472 Government of India, and National Geographic Society, USA. JNCASR provided logistic  
473 support. We thank the office of the PCCF, Karnataka Forest Department, for field permits,  
474 and various officials and staff of Nagarhole National Park for permits and support at the  
475 field site. Ranga, Shankar and Krishna provided field assistance. We thank two anonymous  
476 reviewers and the handling editor for their comments and suggestions.

477

## 478 **References**

- 479 Ahrestani, F.S., Heitkönig, I.M. and Prins, H.H. 2012. Diet and habitat–niche relationships  
480 within an assemblage of large herbivores in a seasonal tropical forest. *Journal of Tropical*  
481 *Ecology* 28: 385–394.
- 482 Andariese, S.W. and Covington, W.W. 1986. Biomass estimation for four common grass  
483 species in northern Arizona ponderosa pine. *Journal of Range Management* 39: 472-473.
- 484 Axmanová, I., Tichý, L., Fajmonová, Z., Hájková, P., Hettenbergerová, E., Li, C.F.,  
485 Merunková, K., Nejezchlebová, M., Otýpková, Z., Vymazalová, M. and Zelený, D. 2012.  
486 Estimation of herbaceous biomass from species composition and cover. *Applied Vegetation*  
487 *Science* 15: 580-589.
- 488 Baskaran, N., Balasubramanian, M., Swaminathan, S. and Desai, A.A. 2010. Feeding ecology  
489 of the Asian elephant *Elephas maximus* Linnaeus in the Nilgiri Biosphere Reserve, southern  
490 India. *Journal of the Bombay Natural History Society* 107: 3-13.
- 491 Blake, S., 2003. *The Ecology of Forest Elephant Distribution and its Implications for*  
492 *Conservation*. PhD thesis, University of Edinburgh, Edinburgh, UK.

- 493 Chiarucci, A.J.B.W., Wilson, J.B., Anderson, B.J. and Dominicus, V. 1999. Cover versus  
494 biomass as an estimate of species abundance: does it make a difference to the conclusions?  
495 *Journal of Vegetation Science* 10: 35-42.
- 496 Codron, D., Lee-Thorp, J.A., Sponheimer, M., Codron, J., De Ruiter, D. and Brink, J.S. 2007.  
497 Significance of diet type and diet quality for ecological diversity of African  
498 ungulates. *Journal of Animal Ecology* 76: 526-537.
- 499 Drew, W.B., 1944. Studies on the use of the point-quadrat method of botanical analysis of  
500 mixed pasture vegetation. *Journal of Agricultural Research* 69: 289-297.
- 501 Elzinga, C.L., Salzer, D.W. and Willoughby, J.W. 1998. *Measuring and Monitoring Plant*  
502 *Populations*. Bureau of Land Management, Denver, Colorado.
- 503 Guevara, J.C., Gonnet, J.M. and Estevez, O.R. 2002. Biomass estimation for native perennial  
504 grasses in the plain of Mendoza, Argentina. *Journal of Arid Environments* 50: 613-619.
- 505 Guo, Q. and Rundel, P.W. 1997. Measuring dominance and diversity in ecological  
506 communities: choosing the right variables. *Journal of Vegetation Science* 8: 405-408.
- 507 Harmony, K.R., Moore, K.J., George, J.R., Brummer, E.C. and Russell, J.R. 1997.  
508 Determination of pasture biomass using four indirect methods. *Agronomy Journal* 89: 665-  
509 672.
- 510 Henschel, J.R., Burke, A. and Seely, M. 2005. Temporal and spatial variability of grass  
511 productivity in the central Namib Desert. *African Study Monographs* 30: 43-56.
- 512 Hermy, M., 1988. Accuracy of visual cover assessments in predicting standing crop and  
513 environmental correlation in deciduous forests. *Vegetatio* 75: 57-64.
- 514 Hurvich, C.M. and Tsai, C.L. 1989. Regression and time series model selection in small  
515 samples. *Biometrika* 76: 297-307.
- 516 Hutto, R. L. 1990. Measuring the availability of resources. *Studies in Avian Biology* 13: 20-  
517 28.
- 518 Iversen, M., Fauchald, P., Langeland, K., Ims, R. A., Yoccoz, N. G. and Bråthen, K. A. 2014  
519 Phenology and cover of plant growth forms predict herbivore habitat selection in a high  
520 latitude ecosystem. *PLoS One* 9: 1-11.

- 521 Kennedy, K.A. and Addison, P.A. 1987. Some considerations for the use of visual estimates  
522 of plant cover in biomonitoring. *Journal of Ecology* 75: 151-157.
- 523 Klimeš, L. 2003. Scale-dependent variation in visual estimates of grassland plant  
524 cover. *Journal of Vegetation Science* 14: 815-821.
- 525 Lavorel, S., Grigulis, K., McIntyre, S., Williams, N. S. G., Garden, D., Dorrough, J., Berman,  
526 S., Quétier, F., Thébault, A. and Bonis, A. 2008. Assessing functional diversity in the field -  
527 methodology matters! *Functional Ecology* 22: 134-147.
- 528 Marsh, K.J., Wallis, I.R., Andrew, R.L. and Foley, W.J. 2006. The detoxification limitation  
529 hypothesis: where did it come from and where is it going? *Journal of Chemical Ecology* 32:  
530 1247-1266.
- 531 Noyce, K. V. and Coy, P. L. 1990. Abundance and productivity of bear food species in  
532 different forest types of northcentral Minnesota. In *Bears: Their Biology and Management*,  
533 Vol. 8, A Selection of Papers from the Eighth International Conference on Bear Research and  
534 Management, Victoria, British Columbia, 1990, pp. 169-181.
- 535 Oliveras, I., Eynden, M., Malhi, Y., Cahuana, N., Menor, C., Zamora, F. and Hørgaasen, T.  
536 2014. Grass allometry and estimation of above-ground biomass in tropical alpine tussock  
537 grasslands. *Austral Ecology* 39: 408-415.
- 538 Owen-Smith, N. and Chafota, J. 2012. Selective feeding by a megaherbivore, the African  
539 elephant (*Loxodonta africana*). *Journal of Mammalogy* 93: 698-705.
- 540 Owen-Smith, R. N. 1988. *Megaherbivores: The Influence of Very Large Body Size on*  
541 *Ecology*. Cambridge University Press, Cambridge, UK.
- 542 Pascal, J. P. 1982. *Bioclimates of the Western Ghats: Maps 1-2*. French Institute of  
543 Pondicherry, Pondicherry, India.
- 544 Pekin, B.K., Endress, B.A., Wisdom, M.J., Naylor, B.J. and Parks, C.G. 2015. Impact of  
545 ungulate exclusion on understory succession in relation to forest management in the  
546 Intermountain Western United States. *Applied Vegetation Science* 18: 252-260.
- 547 Pettorelli, N., Ryan, S.J., Mueller, T., Bunnefeld, N., Jedrzejewski, B., Lima, M. and Kausrud,  
548 K., 2011. The Normalized Difference Vegetation Index (NDVI): unforeseen successes in  
549 animal ecology. *Climate Research* 46: 15-27.

- 550 Radloff, F.G.T. and Mucina, L. 2007. A quick and robust method for biomass estimation in  
551 structurally diverse vegetation. *Journal of Vegetation Science* 18: 719-724.
- 552 Rebollo, S., Milchinas, D. G., Stapp, P., Augustine, D. J. and Derner, J. D. 2013.  
553 Disproportionate effects of non-colonial small herbivores on structure and diversity of  
554 grassland dominated by large herbivores. *Oikos* 122: 1757-1767.
- 555 Reddy, C.S., Jha, C.S., Diwakar, P.G. and Dadhwal, V.K. 2015. Nationwide classification of  
556 forest types of India using remote sensing and GIS. *Environmental Monitoring and*  
557 *Assessment* 187: 1-30.
- 558 Redjadj, C., Duparc, A., Lavorel, S., Grigulis, K., Bonenfant, C., Maillard, D., Saïd, S. and  
559 Loison, A. 2012. Estimating herbaceous plant biomass in mountain grasslands: a comparative  
560 study using three different methods. *Alpine Botany* 122: 57-63.
- 561 Saïd, S., Pellerin, M., Guillon, N., Débias, F. and Fritz, H. 2005. Assessment of forage  
562 availability in ecological studies. *European Journal of Wildlife Research* 51: 242-247.
- 563 Southwood, T.R.E. and Henderson, P.A., 2009. *Ecological methods*. John Wiley & Sons.
- 564 StatSoft, Inc. 2007. Statistica (data analysis software system), Version 8.0. [www.statsoft.com](http://www.statsoft.com)
- 565 Sukumar, R. 1990. Ecology of the Asian elephant in southern India. II. Feeding habits and  
566 crop raiding patterns. *Journal of Tropical Ecology* 6: 33-53.
- 567 Tonteri, T. 1990. Inter-observer variation in forest vegetation cover assessments. *Silva*  
568 *Fennica* 24: 189-196.
- 569 Vidya, T.N.C., Prasad, D. and Ghosh, A. 2014. Individual identification in Asian  
570 elephants. *Gajah* 40: 3-17.
- 571 Walter, C.A., Burnham, M.B., Gilliam, F.S. and Peterjohn, W.T. 2015. A reference-based  
572 approach for estimating leaf area and cover in the forest herbaceous layer. *Environmental*  
573 *Monitoring and Assessment* 187: 1-9.
- 574 Wilmshurst, J.F., Fryxell, J.M. and Colucci, P.E. 1999. What constrains daily intake in  
575 Thomson's gazelles? *Ecology* 80: 2338-2347.
- 576 Wilson, J.B. 1991. Methods for fitting dominance/diversity curves. *Journal of Vegetation*  
577 *Science* 2: 35-46.

578 Wilson, J.B. 2011. Cover plus: ways of measuring plant canopies and the terms used for  
579 them. *Journal of Vegetation Science* 22: 197-206.

580 Wohlfart, C., Wegmann, M. and Leimgruber, P. 2014. Mapping threatened dry deciduous  
581 dipterocarp forest in South-east Asia for conservation management. *Tropical Conservation*  
582 *Science* 7: 597-613.

583 Zar, J.H. 1974. *Biostatistical Analysis*. Prentice-Hall, NJ.

584

585

586 **Tables**

587 **Table 1:** Results from homogeneity of slopes test to examine the effect of forest type on the  
588 regression slopes of graminoid biomass on three continuous predictors: 1) sum of species  
589 covers, 2) total cover, and 3) weighted average of species heights.

|                                           | <b>Sum of species<br/>cover</b>    | <b>Total cover</b>                 | <b>Weighted<br/>heights</b>       |
|-------------------------------------------|------------------------------------|------------------------------------|-----------------------------------|
| <b>Effect of forest type<br/>on slope</b> | $F[2, 33] = 0.35,$<br>$P = 0.704$  | $F[2, 33] = 0.43,$<br>$P = 0.652$  | $F[2, 33] = 1.13,$<br>$P = 0.336$ |
| <b>Effect of continuous<br/>predictor</b> | $F[1, 33] = 57.21,$<br>$P < 0.001$ | $F[1, 33] = 35.34,$<br>$P < 0.001$ | $F[1, 33] = 1.07,$<br>$P = 0.308$ |

590

591

592

593

594

595

596

597

598

599

600

601

602

603

604

605 **Table 2:** Results of regressions to examine how visual estimates of cover explain total  
 606 graminoid biomass in forest habitat, and the additional utility of weighted average of species  
 607 heights in improving the total biomass estimates.  $P < 0.05$  for all beta coefficient values.  
 608  $AICc$  can be used to compare the regressions with and without average species height. The  
 609 difference between a model with the lowest  $AICc$  and other models are not considered  
 610 significant if the difference in  $AICc$  is less than two. The model with the lowest  $AICc$  is  
 611 moderately better than the other models if the difference in  $AICc$  is between 4 and 7, and  
 612 model with the lowest  $AICc$  is considerably better than the other models if the difference in  
 613  $AICc$  is  $>10$ .

614

| Level of analysis                     | Continuous predictors                        | $R$ ,<br>$R^2$           | $F$ test results                | beta                                                                                                                          | $AICc$  |
|---------------------------------------|----------------------------------------------|--------------------------|---------------------------------|-------------------------------------------------------------------------------------------------------------------------------|---------|
| <b>Plot level<br/>(20 x 5m)</b>       | Total cover                                  | 0.80,<br>0.63            | $F[3,35]=20.11$ ,<br>$P<0.001$  | $\text{beta}_{\text{total graminoid cover}}=0.76$                                                                             | -198.24 |
|                                       | Total cover +<br>Weighted height             | 0.82,<br>0.68            | $F[4,34]=17.78$ ,<br>$P<0.001$  | $\text{beta}_{\text{total graminoid cover}}=0.78$ ,<br>$\text{beta}_{\text{weighted ave. of species heights}}=0.21$           | -200.70 |
|                                       | Sum of species<br>cover                      | 0.84,<br>0.70            | $F[3,35]=27.36$ ,<br>$P<0.001$  | $\text{beta}_{\text{sum of graminoid species covers}}=0.82$                                                                   | -206.25 |
|                                       | Sum of species<br>cover +<br>Weighted height | 0.86,<br>0.74            | $F[4,34]=24.00$ ,<br>$P<0.001$  | $\text{beta}_{\text{sum of graminoid species covers}}=0.83$ ,<br>$\text{beta}_{\text{weighted ave. of species heights}}=0.20$ | -208.97 |
| <b>Quadrat<br/>level<br/>(1 x 1m)</b> | Total cover                                  | 0.78,<br>0.61            | $F[3,111]=58.6$<br>$6, P<0.001$ | $\text{beta}_{\text{total graminoid cover}}=0.76$                                                                             | -535.55 |
|                                       | Total cover +<br>Weighted height             | 0.80,<br>0.64            | $F[4,110]=48.5$<br>$5, P<0.001$ | $\text{beta}_{\text{total graminoid cover}}=0.73$ ,<br>$\text{beta}_{\text{weighted ave. of species heights}}=0.16$           | -541.15 |
|                                       | Sum of species                               | 0.85,<br>$F[3,111]=92.7$ |                                 | $\text{beta}_{\text{sum of graminoid species}}$                                                                               | -570.64 |



---

|                 |       |                   |                                                                                          |
|-----------------|-------|-------------------|------------------------------------------------------------------------------------------|
| cover           | 0.71  | 9, $P < 0.001$    | $\text{covers} = 0.84$                                                                   |
| Sum of species  | 0.86, | $F[4,110] = 79.0$ | $\text{beta}_{\text{sum of graminoid species}} = -579.89$                                |
| cover +         | 0.74  | 1, $P < 0.001$    | $\text{covers} = 0.81$ , $\text{beta}_{\text{weighted ave. of species heights}} = -0.17$ |
| Weighted height |       |                   |                                                                                          |

---

615

616

617

618

619

620

621

622

623 **Table 3.** Results for plot-level regressions of graminoid species biomass on 1) visually-  
 624 estimated species cover, and 2) visually-estimated species cover and measured average  
 625 species height, in forest habitat. Details of the regressions are shown based on analysis of log-  
 626 transformed data along with  $R^2$  untransformed data (shown as  $R^2$  (untr.)).  $P$  values for the  
 627 regressions are not shown separately, except for *Digitaria* sp.2, because all the other  $P$  values  
 628 (for transformed and untransformed data) were smaller than 0.001. #Effect of habitat in  
 629 multiple regression was significant. \*\*Effect of height was significant. See Table 2 for  
 630 interpretation of  $AICc$  differences.

631

| Species                       | Species cover |                    |      |        |         |                  | Species cover and avg. species height |                    |      |        |         |                  |
|-------------------------------|---------------|--------------------|------|--------|---------|------------------|---------------------------------------|--------------------|------|--------|---------|------------------|
|                               | $F$           | $df_1,$<br>$df_2$  | $R$  | $R^2$  | $AICc$  | $R^2$<br>(untr.) | $F$                                   | $df_1,$<br>$df_2$  | $R$  | $R^2$  | $AICc$  | $R^2$<br>(untr.) |
| <i>Axonopus compressus</i>    | 22.36         | 3,15               | 0.90 | 0.82 # | -57.69  | 0.71             | 15.77                                 | 4,14               | 0.90 | 0.82 # | -54.56  | 0.71             |
| <i>Chloris dolichostachya</i> | 73.62         | 3,14               | 0.97 | 0.94 # | -58.16  | 0.93 #           | 56.32                                 | 4,13               | 0.97 | 0.95 # | -56.40  | 0.94 #           |
| <i>Cynodon dactylon</i>       | 58.58         | 3,10               | 0.97 | 0.95   | -42.22  | 0.83             | 39.93                                 | 4,9                | 0.97 | 0.95   | -38.30  | 0.85             |
| <i>Cyrtococcum accrescens</i> | 38.47         | 3,22               | 0.92 | 0.84   | -65.74  | 0.67 #           | 29.80                                 | 4,21               | 0.92 | 0.85   | -64.67  | 0.69             |
| <i>Cyrtococcum oxyphyllum</i> | 56.99         | 3,16               | 0.96 | 0.91   | -58.39  | 0.87             | 41.34                                 | 4,15               | 0.96 | 0.92   | -55.79  | 0.88             |
| <i>Cyrtococcum patens</i>     | 113.81        | 3,8                | 0.99 | 0.98   | -40.45  | 0.89             | 82.59                                 | 4,7                | 0.99 | 0.98   | -36.97  | 0.89             |
| <i>Digitaria</i> sp.2         | 4.03          | 3,7; $P=$<br>0.059 | 0.80 | 0.63   | -23.69  | 0.74             | 3.33                                  | 4,6; $P=$<br>0.092 | 0.83 | 0.69   | -20.29  | 0.90**           |
| <i>Kyllinga monocephala</i>   | 82.01         | 3,15               | 0.97 | 0.94   | -48.02  | 0.89             | 57.55                                 | 4,14               | 0.97 | 0.94   | -44.81  | 0.89             |
| <i>Oplismenus compositus</i>  | 74.09         | 3,33               | 0.93 | 0.87   | -100.10 | 0.79             | 64.40                                 | 4,32               | 0.94 | 0.89** | -103.38 | 0.84**           |
| <i>Oryza sativa</i>           | 21.02         | 3,10               | 0.93 | 0.86   | -36.39  | 0.86             | 16.17                                 | 4,9                | 0.94 | 0.88   | -33.94  | 0.87             |

632

633

634

635 **Table 4.** Results for quadrat-level regressions of graminoid species biomass on visually-  
 636 estimated species cover, and of species biomass on visually-estimated species cover and  
 637 measured average species height for forest habitat. Details of the regressions are shown based  
 638 on analysis of log-transformed data along with  $R^2$  untransformed data (shown as  $R^2$  (untr.)).  
 639  $P < 0.001$  for multiple regressions. #Effect of habitat in multiple regression was significant.  
 640 \*\*Effect of height was significant. See Table 2 for interpretation of  $AICc$  differences.

641

| Species                       | Species cover |              |      |        |         |               | Species cover and avg. species height |              |      |        |         |               |
|-------------------------------|---------------|--------------|------|--------|---------|---------------|---------------------------------------|--------------|------|--------|---------|---------------|
|                               | $F$           | $df_1, df_2$ | $R$  | $R^2$  | $AICc$  | $R^2$ (untr.) | $F$                                   | $df_1, df_2$ | $R$  | $R^2$  | $AICc$  | $R^2$ (untr.) |
| <i>Axonopus compressus</i>    | 25.84         | 3,26         | 0.87 | 0.75   | -61.57  | 0.76          | 19.79                                 | 4,25         | 0.87 | 0.76   | -60.24  | 0.76          |
| <i>Chloris dolichostachya</i> | 36.68         | 3,32         | 0.88 | 0.77   | -83.80  | 0.88          | 27.18                                 | 4,31         | 0.88 | 0.78   | -81.81  | 0.88          |
| <i>Cynodon dactylon</i>       | 55.33         | 3,21         | 0.94 | 0.89   | -67.24  | 0.83          | 45.49                                 | 4,20         | 0.95 | 0.90   | -67.53  | 0.83          |
| <i>Cyrtococcum accrescens</i> | 50.27         | 3,41         | 0.89 | 0.79 # | -98.43  | 0.53          | 39.72                                 | 4,40         | 0.89 | 0.80   | -98.76  | 0.61**        |
| <i>Cyrtococcum oxyphyllum</i> | 59.39         | 3,38         | 0.91 | 0.82   | -100.92 | 0.70          | 52.63                                 | 4,37         | 0.92 | 0.85** | -105.28 | 0.72          |
| <i>Cyrtococcum patens</i>     | 42.47         | 3,16         | 0.94 | 0.89   | -55.75  | 0.74          | 31.50                                 | 4,15         | 0.95 | 0.89   | -53.53  | 0.81**        |
| <i>Digitaria</i> sp.2         | 10.69         | 3,15         | 0.83 | 0.68   | -26.19  | 0.81          | 7.48                                  | 4,14         | 0.83 | 0.68   | -22.94  | 0.81          |
| <i>Kyllinga monocephala</i>   | 81.55         | 3,28         | 0.95 | 0.90   | -78.76  | 0.81          | 63.29                                 | 4,27         | 0.95 | 0.90   | -78.17  | 0.82          |
| <i>Oplismenus compositus</i>  | 91.64         | 3,82         | 0.88 | 0.77   | -170.46 | 0.73          | 73.76                                 | 4,81         | 0.89 | 0.78** | -173.8  | 0.74**        |
| <i>Oryza sativa</i>           | 24.31         | 3,14         | 0.92 | 0.84   | -43.74  | 0.85          | 27.39                                 | 4,13         | 0.94 | 0.89** | -47.90  | 0.89**        |

642

643

644

645

646

647 **Table 5:** Results from multiple regressions to examine the relationship between diversity  
648 indices calculated using biomass data and cover data.  $P < 0.001$  in all cases.

649

| Scale                | All graminoid species                    |                                          | Food graminoid species                   |                                          |
|----------------------|------------------------------------------|------------------------------------------|------------------------------------------|------------------------------------------|
|                      | Simpson's index<br>(1-D)                 | Shannon-Wiener<br>index (H')             | Simpson's index<br>(1-D)                 | Shannon-Wiener<br>index (H')             |
| <i>Plot Level</i>    | $R=0.93, R^2=0.87,$<br>$F[3,36]=79.92$   | $R=0.85, R^2=0.72,$<br>$F[3,36]=30.12$   | $R=0.92, R^2=0.85,$<br>$F[3,36]=67.42$   | $R=0.95, R^2=0.89,$<br>$F[3,36]=101.44$  |
| <i>Quadrat Level</i> | $R=0.89, R^2=0.80,$<br>$F[3,115]=150.47$ | $R=0.93, R^2=0.86,$<br>$F[3,115]=232.56$ | $R=0.88, R^2=0.78,$<br>$F[3,115]=132.86$ | $R=0.92, R^2=0.84,$<br>$F(3,115)=205.55$ |

650

651

652

653

654

655

656

657

658

659

660

661

662

663

664

665 **Figures**

666 **Figure 1:** Illustration of a 1 m × 1 m sampling quadrat, showing estimates of total cover,  
667 individual species covers of four species (shown as different combinations of shape and  
668 colour), and sum of species cover. The sum of species cover is higher than total cover  
669 primarily because of between-species overlaps.

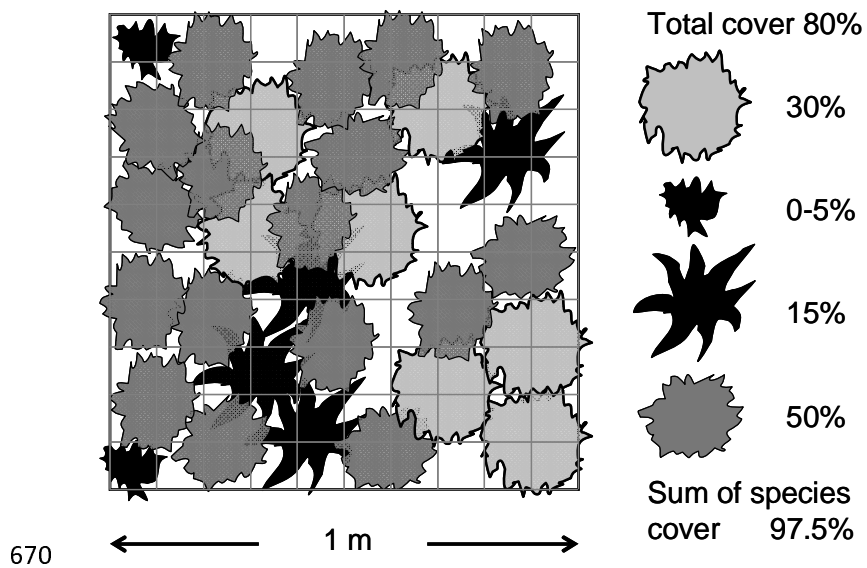

670

671

672 **Figure 2:** Locations of sampling sites in the study area. The forest type classification is based  
673 on Pascal (1982). Inset: map of southern India showing the location of Nagarahole National  
674 Park.

675

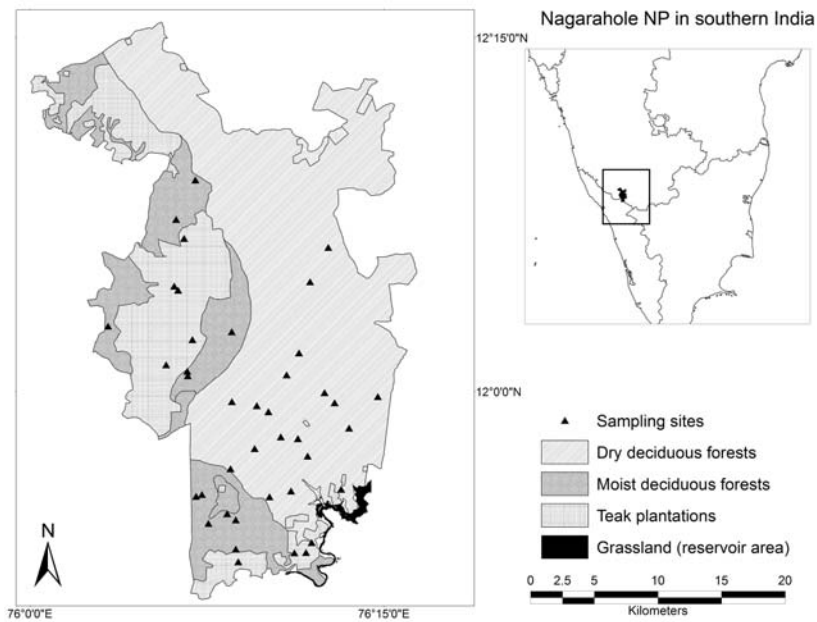

678 **Figure 3:** Scatter plots for the plot-level graminoid abundance data from the forest plots,  
679 showing the relation between a) visually-assessed total graminoid cover and total graminoid  
680 biomass and b) the sum of visually-assessed individual graminoid species cover and total  
681 graminoid biomass.

682

a)  $y = -0.0216 + 0.00410x$

b)  $y = 0.01824 + 0.00247x$

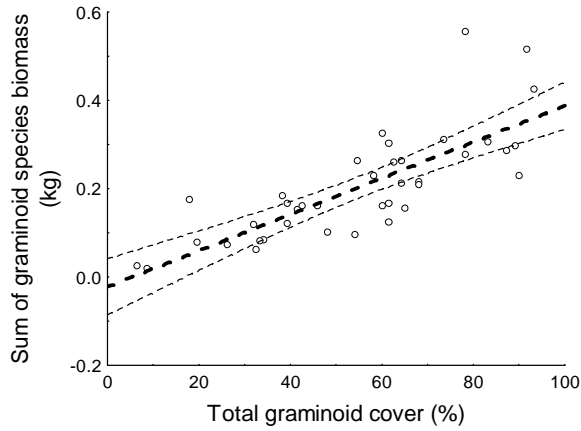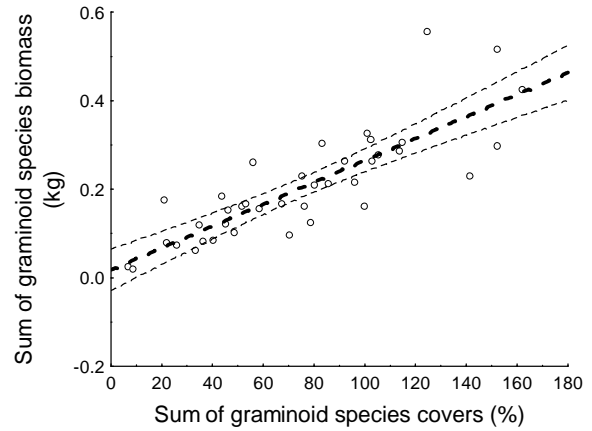

683

684

685



686 **Figure 4:** Scatter plots for the plot-level graminoid abundance data from the forest plots,  
687 showing the relationships between Simpson's diversity indices ( $1-D$ ) calculated from cover  
688 and biomass data (a, c) and Shannon-Wiener diversity indices ( $H'$ ) calculated from cover and  
689 biomass data (b, d). All graminoid species are included in a) and b), while only elephant food  
690 species are included in c) and d).

691

a)  $y = -0.0068 + 0.97050x$

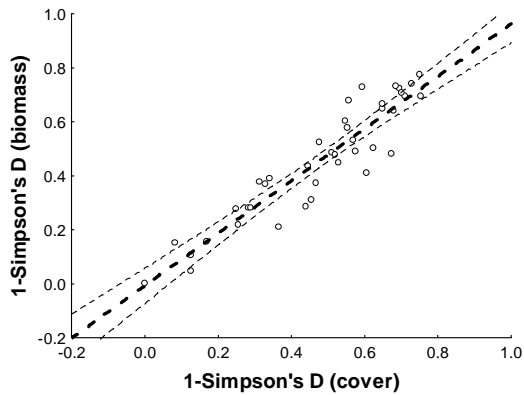

b)  $y = -0.0484 + 0.96844x$

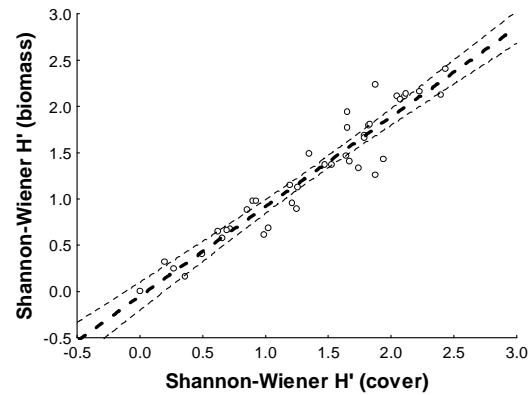

c)  $y = 0.00123 + 0.94883x$

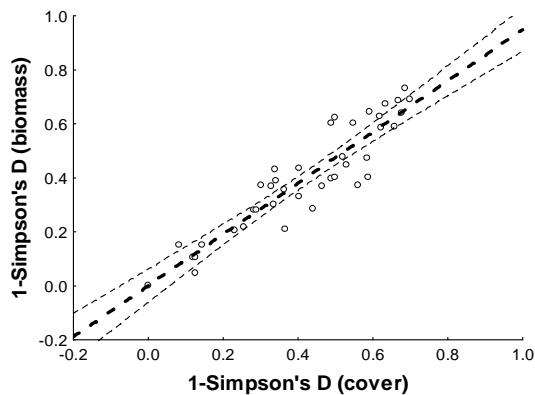

d)  $y = -0.0295 + 0.96124x$

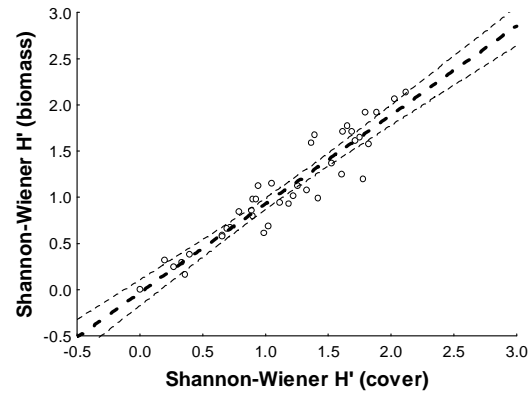

692

693
